# Supplementary material for: Facile preparation of N,S-doped hierarchical porous carbons based on 3-aminophenol-3-mercaptophenol co-resins for supercapacitor applications
Source: Royal Society of Chemistry journal article supplement (doi:10.1039/c6ra08903h), 2016-01-01
Supplement: c6ra08903h1.pdf [file c6ra08903h1.pdf]

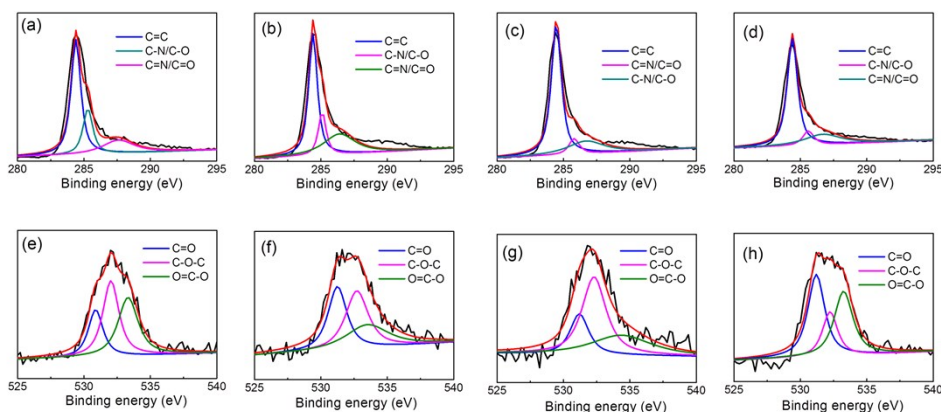

**Fig. S1** High resolution XPS patterns: C1s (a) NSHPC-700, (b) NSHPC-800, (c) NSHPC-900; O1s (d) NSHPC-700, (d) NSHPC-800, (f) NSHPC-900

**Table S1** Element composition (mol.%) determined by XPS measurement

| Sample    | N    | O   | S   |
|-----------|------|-----|-----|
| NSHPC-600 | 2.6  | 6.7 | 0.4 |
| NSHPC-700 | 2.3  | 5.9 | 0.6 |
| NSHPC-800 | 0.98 | 5.0 | 0.4 |
| NSHPC-900 | 0.34 | 4.1 | 0.3 |
